# Supplementary material
Source: Frontiers journal article supplement (https://www.frontiersin.org/articles/123114)
Supplement: Data_Sheet_1.XLS [file Data_Sheet_1.XLS]

## Sheet: PrPC
		Da uM	0	50	100	average
Exp1	gel1	PrPC Di Glic	70365391	39553257	25856453		total PrPC					Unglycosilated
		PrPC Mono Glic	24114597	13454185	11534506
		PrPC unGlic	34075197	22337322	6881067		Exp1	1.53217	0.986189	0.481641		Exp1	1.57543	1.13418	0.290397
		GAPDH	32234648	29351666	35313896		Exp2	0.848493	0.905204	1.2463		Exp2	1.62367	1.08701	0.289321
		total PrPC/GAPDH	3.98811	2.56697	1.25367	2.60291	Exp3	0.779565	1.34976	0.870677		Exp3	1.09651	1.75077	0.152727
		Normalized by average	1.53217	0.986189	0.481641		Exp4	1.02051	0.978344	1.00114		Exp4	1.15668	1.27431	0.569008
		PrPC unGlic/GAPDH	1.0571	0.761024	0.194854	0.670992	Exp5	1.11213	1.12958	0.758283		Exp5	1.10023	1.46296	0.436811
		Normalized by average	1.57543	1.13418	0.290397		mean	1.05858	1.06982	0.871609		mean	1.3105	1.34184	0.347653
Exp2	gel1	PrPC Di Glic	3585469	3777380	8823075		STD	0.296053	0.17635	0.283766		STD	0.265483	0.271345	0.159393
		PrPC Mono Glic	1887023	3533855	5766007		CI95	0.259497	0.154575	0.248727		CI95	0.232702	0.23784	0.139711
		PrPC unGlic	3534759	1539321	519022
		GAPDH	7295648	6445262	4283485
		total PrPC/GAPDH	1.23461	1.37319	3.52706	2.04495
		Normalized by average	0.603734	0.671502	1.72476
		PrPC unGlic/GAPDH	0.484502	0.23883	0.121168	0.2815
		Normalized by average	1.72114	0.848418	0.430437
	gel2	PrPC Di Glic	4713531	9436738	7678475
		PrPC Mono Glic	3542516	7506983	2234599
		PrPC unGlic	4277439	6738661	490923
		GAPDH	6020369	10919666	7115426
		total PrPC/GAPDH	2.08185	2.16878	1.46217	1.90427
		Normalized by average	1.09325	1.13891	0.767841
		PrPC unGlic/GAPDH	0.710494	0.617112	0.0689942	0.465534
		Normalized by average	1.52619	1.3256	0.148204
Exp3	gel1	PrPC Di Glic	4446357	8800790	4383935
		PrPC Mono Glic	1675095	5156053	584866
		PrPC unGlic	4776900	5666065	217361
		GAPDH	13990495	14006039	6374159
		total PrPC/GAPDH	0.778983	1.40103	0.813623	0.997879
		Normalized by average	0.780638	1.40401	0.815352
		PrPC unGlic/GAPDH	0.341439	0.404544	0.0341003	0.260028
		Normalized by average	1.31309	1.55577	0.131141
	gel2	PrPC Di Glic	4047711	5638001	3125119
		PrPC Mono Glic	1588590	5518071	2655184
		PrPC unGlic	2764936	8670567	335196			Five independent experiments were performed.
		GAPDH	10572192	14992890	6469872
		total PrPC/GAPDH	0.794654	1.3224	0.945227	1.02076		The samples of experiment 2 and 3 were analyzed in duplicates
		Normalized by average	0.778492	1.29551	0.926002
		PrPC unGlic/GAPDH	0.261529	0.578312	0.0518088	0.297217
		Normalized by average	0.879928	1.94576	0.174313
Exp4	gel1	PrPC Di Glic	40370626	31139708	25021072
		PrPC Mono Glic	22255227	17144987	14619820
		PrPC unGlic	30448812	29088115	7779068
		GAPDH	8530151	7396754	4430063
		total PrPC/GAPDH	10.9113	10.4604	10.7041	10.6919
		Normalized by average	1.02051	0.978344	1.00114
		PrPC unGlic/GAPDH	3.56955	3.93255	1.75597	3.08603
		Normalized by average	1.15668	1.27431	0.569008
Exp5	gel2	PrPC Di Glic	46631127	28605815	27781374
		PrPC Mono Glic	22300181	15305153	16004325
		PrPC unGlic	26445004	25021493	8430265
		GAPDH	6769078	4816732	5435234
		total PrPC/GAPDH	14.09	14.311	9.60694	12.6693
		Normalized by average	1.11213	1.12958	0.758283
		PrPC unGlic/GAPDH	3.90674	5.1947	1.55104	3.55083
		Normalized by average	1.10023	1.46296	0.436811
